# Supplementary material
Source: MDPI journal article supplement (https://www.mdpi.com/1424-2818/13/7/326)
Supplement: s1 [file s1]

**Table S1.** List native of cave species recorded from the Undara Lava Tube System that possibly can complete their life cycle underground as troglophiles. Some may be found to be troglobionts pending further study. \* Indicates ASF number.

| #  | Species                                         | Taxonomic Classification                    | Caves*     | Reference  |
|----|-------------------------------------------------|---------------------------------------------|------------|------------|
| 1  | Undetermined genus species (tiny eyes)          | Crustacea: Isopoda: Oniscoidea              | U-34       | [30]       |
| 2  | Undetermined genus species (large sp.)          | Crustacea: Isopoda: Oniscoidea              | U-17       | [54]       |
| 3  | <i>Forsterina</i> species                       | Arachnida: Araneae: Desidae                 | U-31       | [30]       |
| 4  | <i>Spermophora</i> species 3                    | Arachnida: Araneae: Pholcidae:              | U-30       | [2]        |
| 5  | <i>Nesticella</i> species 2                     | Arachnida: Araneae Nesticidae               | U-30       | [2]        |
| 6  | Unidentified. spider, possibly Tb               | Arachnida: Araneae: family?                 | U-42       | [30]       |
| 7  | Unidentified harvestman                         | Opilionida: Phalangidae? Misidentified?     | U-26; U-27 | [32]       |
| 8  | Unidentified genus and species                  | Chilopoda: Geophilida                       | U-30       | [2]        |
| 9  | Unidentified genus and species                  | Symphyla                                    | U-30       | [2]        |
| 10 | <i>Paratemnopteryx stonei</i> Roth 1990         | Insecta: Blattodea: Ectobiidae              | U-30; U-34 | [51]       |
| 11 | <i>Paratemnopteryx howarthi</i> Roth 1990       | Insecta: Blattodea: Ectobiidae              | U-46       | [50]       |
| 12 | <i>Neotemnopteryx undarensis</i> Slaney 2000    | Insecta: Blattodea: Ectobiidae              | U52; U-51; | [65]       |
| 13 | Unidentified genus and species                  | Insecta: Coleoptera: Carabidae              | U-42; U-34 | [30]       |
| 14 | Unidentified genus and species                  | Insecta: Coleoptera: Ptiliidae:             | U-30       | [2]        |
| 16 | Unidentified genus and species                  | Insecta: Diptera: Phoridae:                 | U-30       | [2]        |
| 15 | <i>Undarana rosella</i> Hoch & Howarth          | Insecta: <i>Auchenorrhyncha</i> : Cixiidae: | U-30       | [5]        |
| 16 | <i>Oliarus</i> sp. 1                            | Insecta: <i>Auchenorrhyncha</i> : Cixiidae: | U-30, U-17 | [2]        |
| 17 | Unidentified genus and species                  | Insecta: <i>Sternorrhyncha</i> : Coccoidea  | U-30       | [2]        |
| 18 | <i>Ploiaria</i> species 1                       | Insecta: Hemiptera: Reduviidae              | U-42       | [30]       |
| 19 | c.f. <i>Schrankia</i> species 1                 | Insecta: Lepidoptera: Erebiidae             | U-30; U17  | [2]        |
| 20 | <i>Metrinura subtropica</i> Smith 2006          | Insecta: Zygentoma: Nicoletiidae            | U-30       | [52]       |
| 21 | <i>Pseudogastrotheus undarae</i><br>Smith, 2016 | Insecta: Zygentoma: Nicoletiidae            | U-30, U-34 | [53]       |
| 22 | <i>Psilotum</i> species                         | Plantae: Psilotales: Psilotaceae            | U-30       | This paper |

**Table S2.** List of invertebrates recorded from the Undara Lava Tube System as visitors (=troglonemes) or as 'incidentals' / 'accidentals.' \* Indicates ASF number.

| #  | Species                                                    | Taxonomic Classification                      | Caves*           | Reference |
|----|------------------------------------------------------------|-----------------------------------------------|------------------|-----------|
| 1  | <i>Heteropoda</i> species 1                                | Arachnida: Araneae: Sparassidae:              | U-30, U-34; U-31 | [2]       |
| 2  | <i>Heteropoda alta</i> Davies 1994                         | Arachnida: Araneae: Sparassidae:              | Michael's        | [55]      |
| 3  | <i>Scolopendra</i> species 1                               | Chilopoda: Scolopendridae                     | U-30             | [2]       |
| 4  | Unidentified genus and species                             | Insecta: Isoptera                             | U-30             | [2]       |
| 5  | <i>Macropanesthia rhinoceros</i> Saussure, 1895            | Insecta: Blattodea: Blaberidae                | U-17; U-51 [Acc] | [35]      |
| 6  | Unidentified genus and species                             | Insecta: Coleoptera: Carabidae                | U-42             | [30]      |
| 7  | Undet Galerucinae                                          | Insecta: Coleoptera: Chrysomelidae            | U-34             | [30]      |
| 8  | unidentified dermestid beetle                              | Insecta: Coleoptera: Dermestidae              | U-42             | [30]      |
| 9  | Unidentified genus and species                             | Insecta: Coleoptera: Histeridae:              | U-17             | [30]      |
| 10 | <i>Pterohelaus</i> sp.                                     | Insecta: Coleoptera: Tenebrionidae            | U-42             | [30]      |
| 11 | <i>Omorgus</i> sp.                                         | Insecta: Coleoptera: Trogidae                 | U-34             | [30]      |
| 12 | Unidentified genus and species                             | Insecta: Coleoptera: Scarabaeidae             | U-30, U-34; U-42 | [2,30]    |
| 13 | <i>Idiophlebotomus wellingsae</i> Lewis and Dyce 1983      | Insecta: Diptera: Psychodidae: Phlebotominae  | U-30, U-17       | [2,56]    |
| 14 | <i>Paratrechina longicornis</i> (Latreille, 1802)          | Insecta: Hymenoptera: Formicidae:             | U-30             | [2]       |
| 15 | <i>Paratrechina</i> species 1                              | Insecta: Hymenoptera: Formicidae:             | U-30             | [2]       |
| 16 | <i>Platythyrea</i> species 1.                              | Insecta: Hymenoptera: Formicidae:             | U-30             | [2]       |
| 17 | <i>Prolasius</i> sp                                        | Insecta: Hymenoptera: Formicidae:             | U-17             | [30]      |
| 18 | Unidentified genus and species                             | Insecta: Hymenoptera: Formicidae:             | U-34             | [30]      |
| 19 | <i>Coranus</i> sp.                                         | Insecta: Hemiptera: Reduviidae: Harpactorinae | U-34             | [30]      |
| 20 | <i>Speiredonia spectans</i> , (Guenée, 1852)               | Insecta: Lepidoptera: Erebidae                | U-30             | [2]       |
| 21 | Unidentified genus and species                             | Insecta: Lepidoptera: Gelechiidae             | U-30             | [2]       |
| 22 | <i>Pyralis</i> species near <i>manihotalis</i> Guenee 1854 | Insecta: Lepidoptera: Pyralidae               | U-34             | [30]      |
| 23 | Unidentified genus and species                             | Insecta: Lepidoptera: Tineidae?               | U-17             | [30]      |
| 24 | Unidentified genus and species                             | Insecta: Psocoptera:                          | U-17             | [30]      |
| 25 | Unidentified genera and species                            | Arachnida: Acarina:                           | Multiple caves   | [2]       |

**Table S3.** Environmental data collected at various sites within Bayliss and Nasty Caves between June 1985 and January 1989.

| Cave    | Date            | Site                                                               | °C      | % RH      | Volume % CO <sub>2</sub> | Volume % O <sub>2</sub> |
|---------|-----------------|--------------------------------------------------------------------|---------|-----------|--------------------------|-------------------------|
| Bayliss | 14-15.June.1985 | 30 m from entrance slope                                           | 22.8    | 95        | 0.4                      | 19.4                    |
|         |                 | 270 m from entrance                                                | 23.2    | ~98       | 0.5                      | 19                      |
|         |                 | 430 m from entrance                                                | 25.3    | ~99       | 0.6                      | 21.2                    |
|         |                 | 620 m from entrance                                                | 26.4    | ~98       | 2.8                      | 18.8                    |
|         |                 | 640 m from entrance                                                | -       | -         | 4.4                      | -                       |
|         |                 | 860 m from entrance                                                | 26.6    | 100       | 5.9                      | 15.1                    |
| Bayliss | 31.May. 1986    | Base entrance talus                                                | 23.8    | ~95       | 0.37                     | 18.7                    |
|         |                 | ½ way between entrance and duckunder. ~200 m into cave             | 23.8    | ~95       | 0.29                     | -                       |
|         |                 | 15 m outside duckunder, 325 m from entrance                        | 24.4    | ~95       | 0.28                     | -                       |
|         |                 | 10 m beyond duckunder, 350 m from entrance                         | 25-25.8 | >95 - 100 | 0.25                     | -                       |
|         |                 | ~500 m from entrance.                                              | 25.7    | 100       | 0.4                      | -                       |
|         |                 | Top of wall, 620 m from entrance                                   | 26.2    | 100       | 1.5                      | 17.4                    |
|         |                 | Base of wall, 640 m from entrance                                  | 26.4    | 100       | 3.7                      | 14.2                    |
|         |                 | End of main cave/ 900 m from entrance                              | 27.1    | >100      | 4.4                      | 13                      |
| Bayliss | 13.June. 1986   | Below entrance slope                                               | 23.3    | 95        | 0.23                     | -                       |
|         |                 | ½ way entrance to duckunder /on floor, ~200 m from entrance        | 23.7    | 95        | -                        | -                       |
|         |                 | ½ way entrance to duckunder /2 m above floor, ~200 m from entrance | 23.9    | 95        | -                        | -                       |

|         |                  |                                                              |       |       |           |            |
|---------|------------------|--------------------------------------------------------------|-------|-------|-----------|------------|
|         |                  | 5 m outside duckunder / on floor, 330 m from entrance        | 24    | 95    | -         | -          |
|         |                  | 5 m outside duckunder / 2 m above floor, 330 m from entrance | 24.7  | 95    | -         | -          |
|         |                  | 5 m inside duckunder / on floor, 350 m from entrance         | 24.7  | 95    | -         | -          |
|         |                  | 5 m inside duckunder / 2 m off floor, 350 m from entrance    | 25.6  | >100  | -         | -          |
|         |                  | ½ wall and duckunder, ~500 m from entrance                   | 25.7  | 100   | 0.4       | 18.1       |
|         |                  | 5 m above wall, 620 m from entrance                          | 26.4  | >95   | 2         | -          |
|         |                  | 3 m below wall, 650 m from entrance                          | 27.1  | >100  | 3.8       | 13.3       |
|         |                  | At crawl, 900 m from entrance                                | 26.7  | >100  | 4.4       | 12.8       |
| Bayliss | 10.January .1989 | Above wall                                                   | 26.2  | 100   | 1.7       | -          |
|         |                  | At base of wall                                              | 26.2  | 100   | 2.2       | -          |
|         |                  | 950 m from entrance                                          | 26.8  | 100   | 2.9       | 14.5       |
|         |                  | In extension, ~1,200 m from entrance                         | 27    | 100   | 3.0       | -          |
| Bayliss | 12.January .1989 | Base entrance slope                                          | 24    | ~100  | 0.4       | 17.9       |
|         |                  | 250 m from entrance                                          | 24.2  | ~100  | 0.95      | -          |
|         |                  | Beyond d-u                                                   | 25.3  | ~100  | 1.3       | 17-17.5    |
|         |                  | At wall                                                      | 26.1  | >100  | 2.0       | -          |
|         |                  | Below wall                                                   | 26.3  | ~100  | 2.0       | 16         |
|         |                  | 800 m from entrance                                          | 26.7  | >100  | 2.5       | 16         |
|         |                  | 900 m from entrance                                          | 27.2  | 100   | 3.1       | 14.2       |
| Nasty   | 29.May.1986      | 25 m from entrance                                           | 25.4  | >95%  | 3.6       | 14.8       |
|         |                  | 120 m from entrance nr end                                   | 26.7  | >100  | 5.1       | 13.7       |
| Nasty   | 30.May.1986      | 110 m from entrance                                          | 26.5  | 100   | 3.4       | -          |
| Nasty   | 11.January.1989  | Nr base of entrance slope                                    | 26.7  | >95 % | 4.4 %     | 14%        |
|         |                  | ~25 m from entrance                                          | 26.6  | >95%  | 5%        | -          |
|         |                  | ~50 m from entrance                                          | 26.8  | ~100% | 5.1-5.3 % | 12.8-13.1% |
|         |                  | ~75 m from entrance                                          | 27.1  | ~100% | 5.6%      | -          |
|         |                  | ~125 m from entrance                                         | 27.2C | ~100% | 5.8%      | 13.5%      |
| Bayliss | 10.January .1989 | Above wall                                                   | 26.2  | 100   | 1.7       | -          |
|         |                  | At base of wall                                              | 26.2  | 100   | 2.2       | -          |
|         |                  | 950 m from entrance                                          | 26.8  | 100   | 2.9       | 14.5       |
|         |                  | In extension, ~1,200 m from entrance                         | 27    | 100   | 3.0       | -          |
| Bayliss | 12.January .1989 | Base entrance slope                                          | 24    | ~100  | 0.4       | 17.9       |
|         |                  | 250 m from entrance                                          | 24.2  | ~100  | 0.95      | -          |
|         |                  | Beyond duck under                                            | 25.3  | ~100  | 1.3       | 17-17.5    |
|         |                  | At wall                                                      | 26.1  | >100  | 2.0       | -          |
|         |                  | Below wall                                                   | 26.3  | ~100  | 2.0       | 16         |
|         |                  | 800 m from entrance                                          | 26.7  | >100  | 2.5       | 16         |
|         |                  | 900 m from entrance                                          | 27.2  | 100   | 3.1       | 14.2       |
| Nasty   | 29.May.1986      | 25 m from entrance                                           | 25.4  | >95%  | 3.6       | 14.8       |
|         |                  | 120 m from entrance nr end                                   | 26.7  | >100  | 5.1       | 13.7       |
| Nasty   | 30.May.1986      | 110 m from entrance                                          | 26.5  | 100   | 3.4       | -          |
| Nasty   | 11.January.1989  | Nr base of entrance slope                                    | 26.7  | >95 % | 4.4 %     | 14%        |
|         |                  | ~25 m from entrance                                          | 26.6  | >95%  | 5%        | -          |
|         |                  | ~50 m from entrance                                          | 26.8  | ~100% | 5.1-5.3 % | 12.8-13.1% |
|         |                  | ~75 m from entrance                                          | 27.1  | ~100% | 5.6%      | -          |
|         |                  | ~125 m from entrance                                         | 27.2C | ~100% | 5.8%      | 13.5%      |
